# Supplementary material for: Sex differences in the relationship between household solid fuel use and incident stroke and the mediating role of depressive symptoms in middle-aged and older Chinese adults
Source: Research Square preprint supplement (doi:10.21203/rs.3.rs-7872823/v1), 2025-11-14
Supplement: Supplementary file 1 [file 9b97c6b4b8c844cae8b43f00.docx]

**Table S1:** Missing value of the covariates

|  | No. of missing values | Proportion (%) |
| --- | --- | --- |
| Age | 0 | 0 |
| Sex | 0 | 0 |
| Marital status | 0 | 0 |
| Place of residence | 0 | 0 |
| Education level | 0 | 0 |
| Smoking | 2 | 0.01 |
| Alcohol consumption | 1787 | 12.83 |
| Body mass index | 2039 | 14.64 |
| History of hypertension | 67 | 0.48 |
| History of diabetes | 122 | 0.88 |
| History of heart disease | 59 | 0.42 |

**Table S2:** Sensitive analyses of the association between household solid fuel use and the risk of stroke

|  | Sensitive analyses 1 | Sensitive analyses 2 |
| --- | --- | --- |
| Total population |  |  |
| Clean fuel | Ref (1.00) | Ref (1.00) |
| Solid fuel | 1.23 (1.01, 1.50) | 1.36 (1.14, 1.64) |
| Men |  |  |
| Clean fuel | Ref (1.00) | Ref (1.00) |
| Solid fuel | 1.10 (0.83, 1.46) | 1.19 (0.92, 1.54) |
| Women |  |  |
| Clean fuel | Ref (1.00) | Ref (1.00) |
| Solid fuel | 1.35 (1.03, 1.77) | 1.53 (1.19, 1.99) |

Sensitive analyses 1: excluding the participants with missing values of covariates;

Sensitive analyses 2: excluding the incident cases of stroke within the first two years.

Models adjusted for age, sex, marital status, place of residence, education level, smoking, alcohol consumption, body mass index, history of hypertension, diabetes, and heart disease.
